# Supplementary material for: D-dopachrome tautomerase contributes to lung epithelial repair via atypical chemokine receptor 3-dependent Akt signaling
Source: PubMed Central journal article supplement (PMC8185224; doi:10.1016/j.ebiom.2021.103412), 2021-06-04

**Supplemental data file 2 to:**

**D-dopachrome tautomerase contributes to lung epithelial repair via atypical chemokine receptor 3-dependent Akt signaling**

**Shanshan Song<sup>1,2</sup>, Bin Liu<sup>2</sup>, Habibie Habibie<sup>1,3,4</sup>, Jelle van den Bor<sup>5</sup>, Martine J. Smit<sup>5</sup>, Reinoud Gosens<sup>1,3</sup>, Xinhui Wu<sup>1,3</sup>, Corry-Anke Brandsma<sup>3,6</sup>, Robbert. H. Cool<sup>2</sup>, Hidde J. Haisma<sup>2</sup>, Gerrit J. Poelarends<sup>2</sup>, Barbro N. Melgert<sup>1,3</sup>**

*1. Groningen Research Institute of Pharmacy, Department of Molecular Pharmacology, University of Groningen, Antonius Deusinglaan 1, 9713 AV, Groningen, The Netherlands*

*2. Groningen Research Institute of Pharmacy, Department of Chemical and Pharmaceutical Biology, University of Groningen, Antonius Deusinglaan 1, 9713 AV, Groningen, The Netherlands*

*3. University Medical Center Groningen, Groningen Research Institute of Asthma and COPD, University of Groningen, Hanzeplein 1, 9713 GZ, Groningen, The Netherlands*

*4. Faculty of Pharmacy, Hasanuddin University, Makassar 90245, Indonesia*

*5. Division of Medicinal Chemistry, Amsterdam Institute of Molecular and Life Sciences, Vrije Universiteit Amsterdam, De Boelelaan 1108, 1081 HZ, Amsterdam, The Netherlands*

*6. University Medical Center Groningen, Department of Pathology and Medical Biology, University of Groningen, Hanzeplein 1, 9713 GZ Groningen*

# Figure 3a

Replicate 1

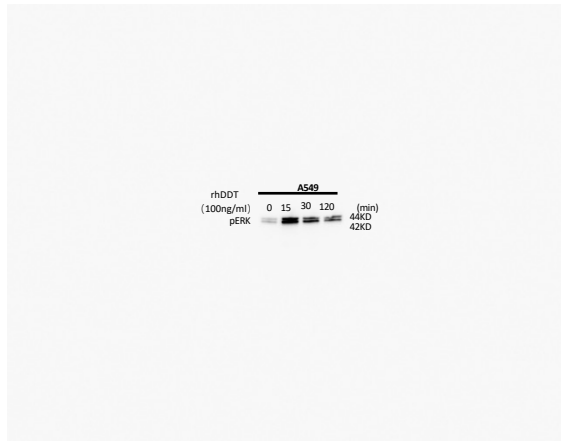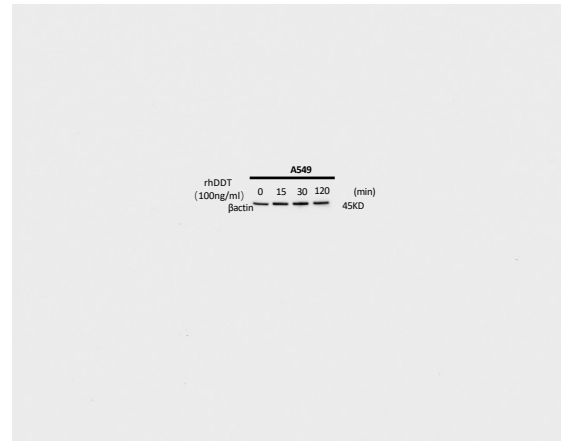

Replicate 2

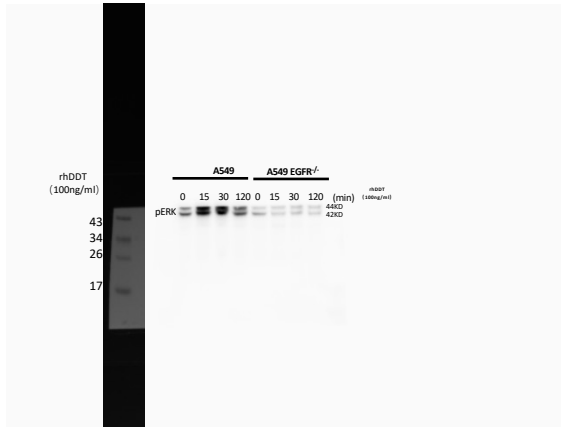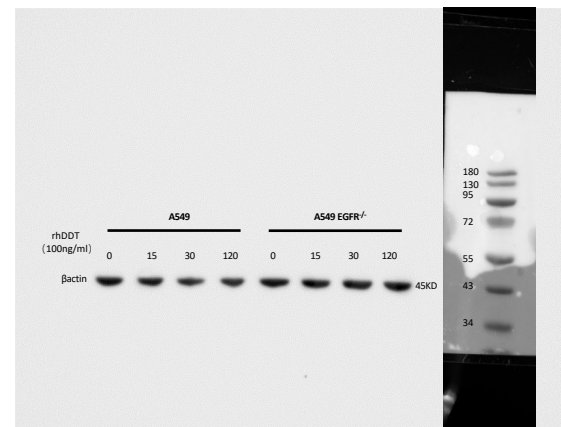

Replicate 3

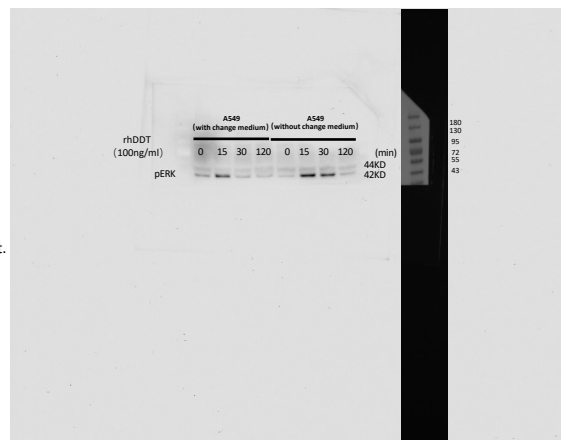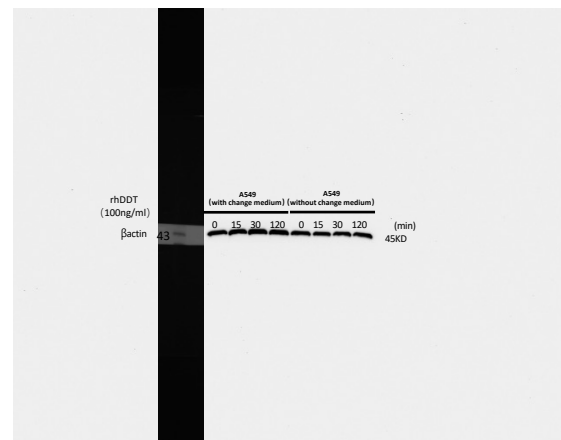

We used the data of "without change medium" for the manuscript.

Figure 3b

Replicate 1

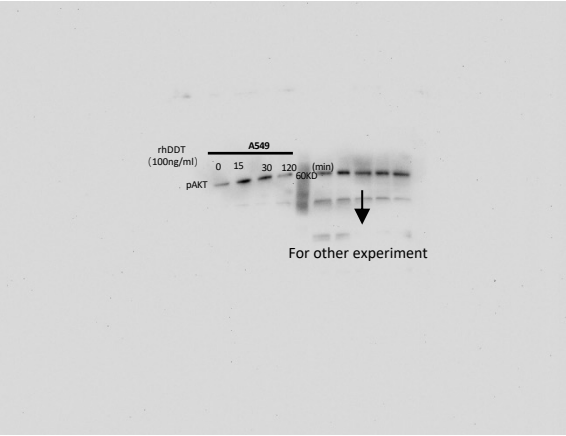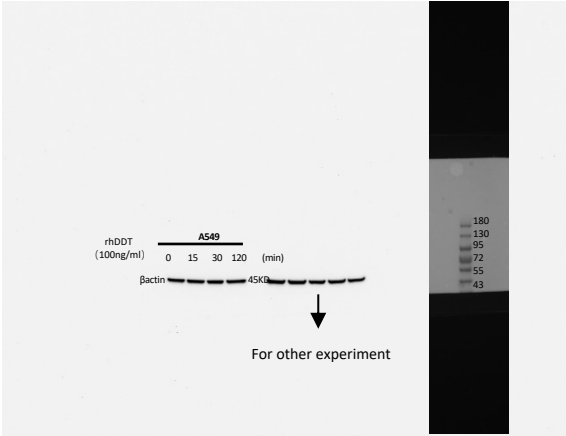

Replicate 2

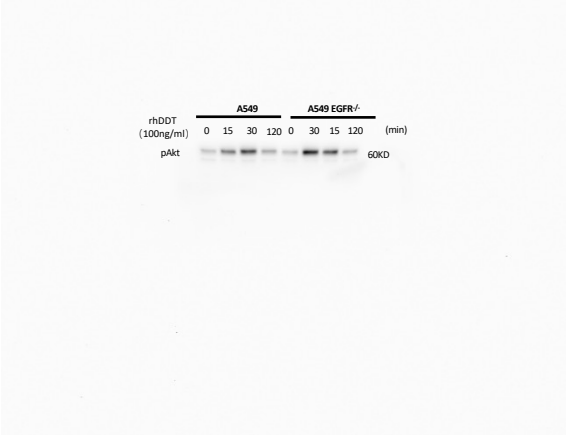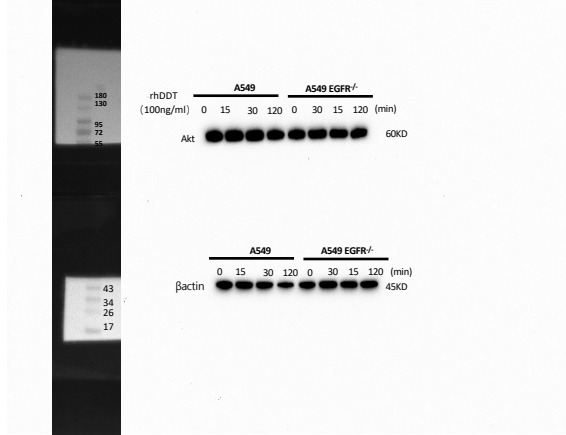

We used parts of the data from this experiment for figure 3b/d and figure 4g. In figure 3 we used results from the wildtype A549 cells and in figure 4g we compared wildtype A549 cells to EGFR KO A549 cells.

Replicate 3

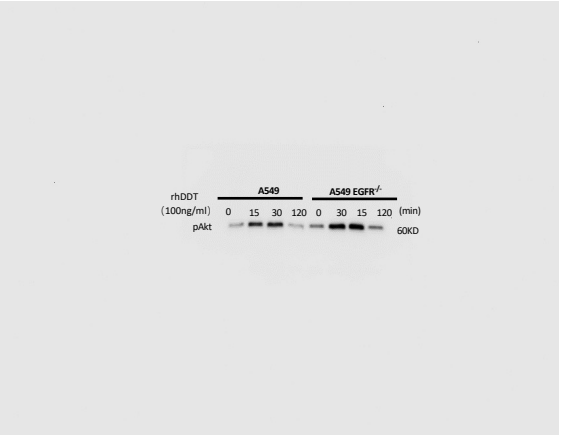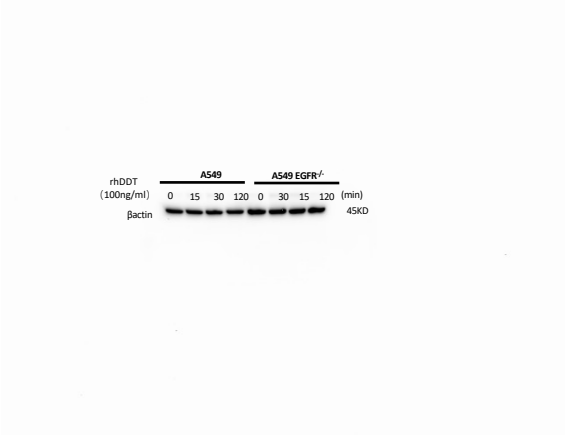

# Figure 3d

## Replicate 1

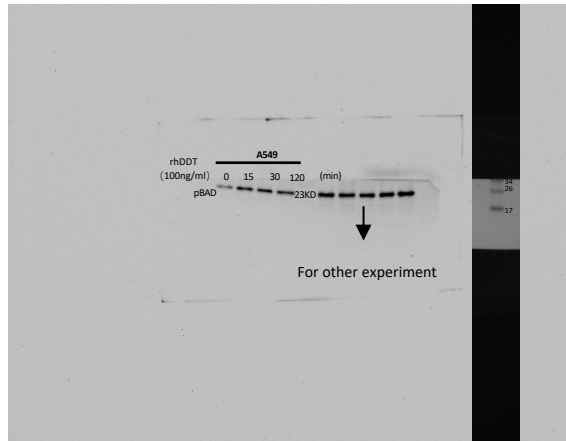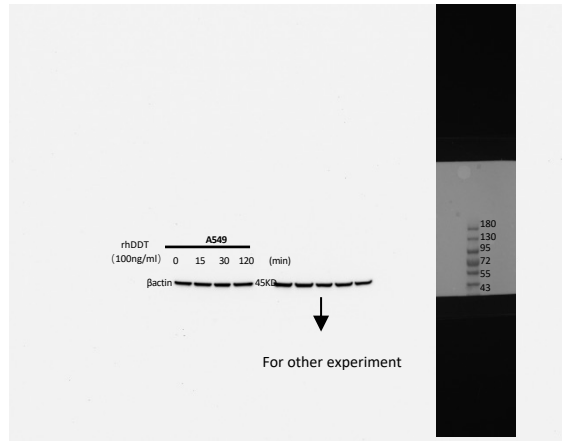

## Replicate 2

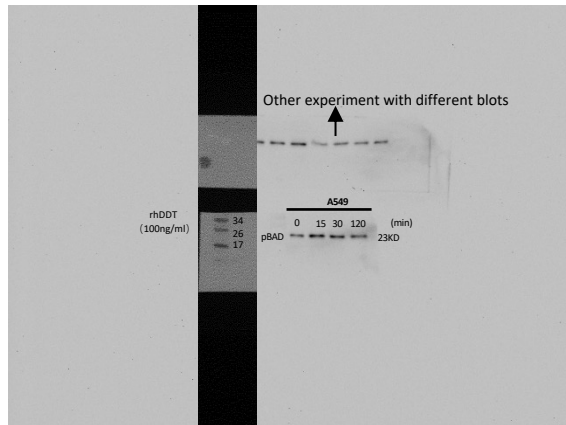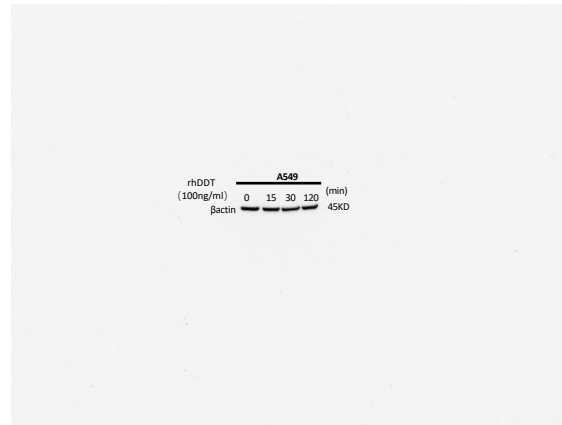

## Replicate 3

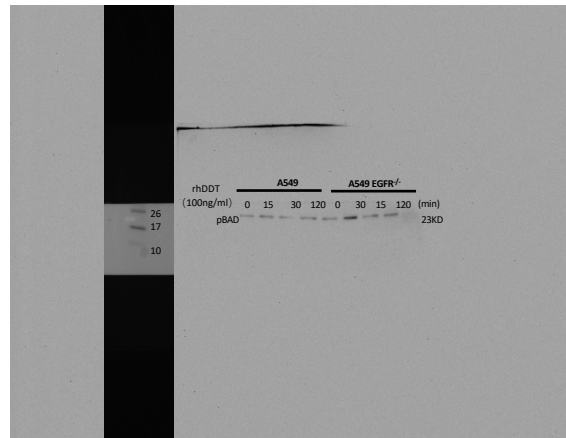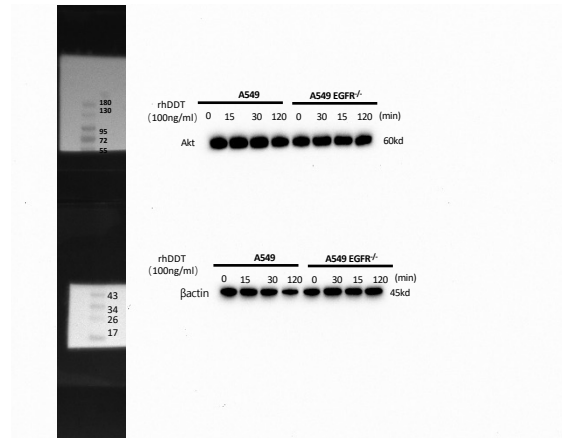

Figure 4b

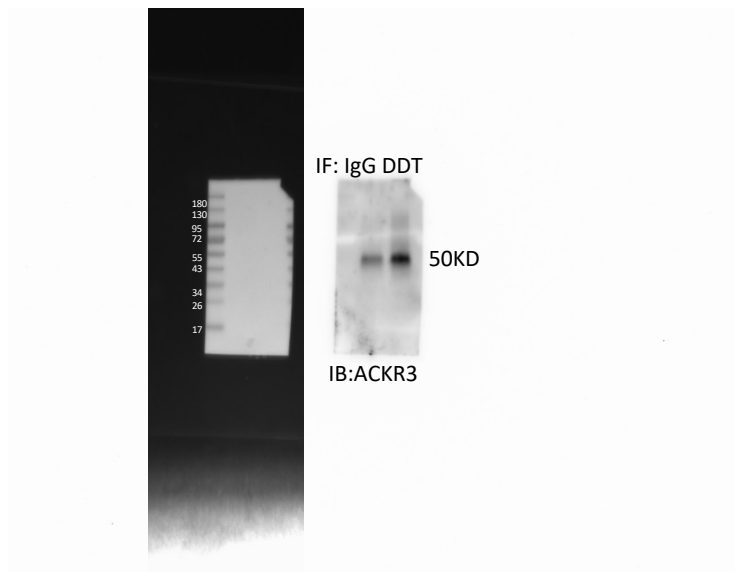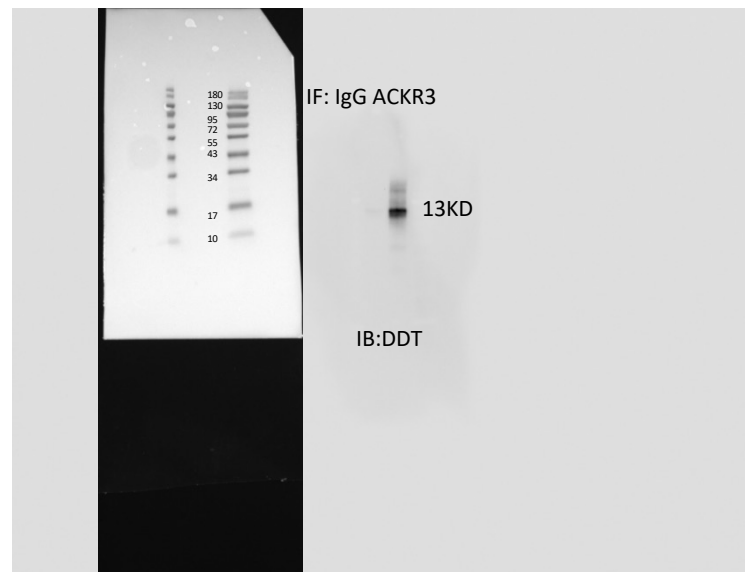

Figure 4g  
Replicate 1

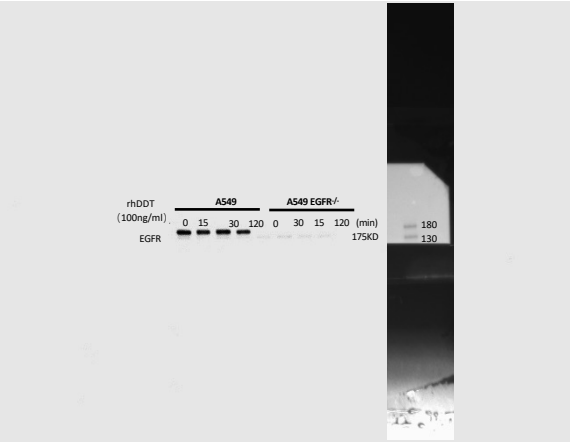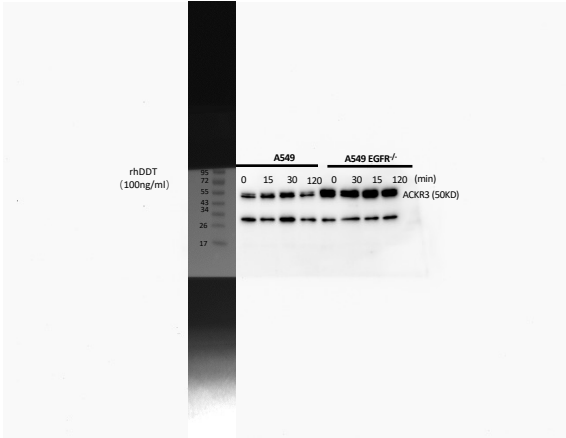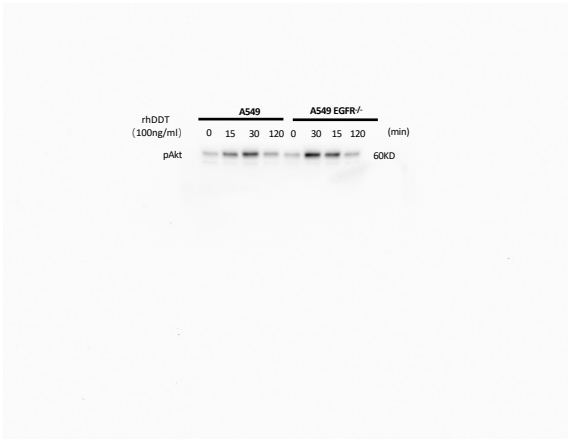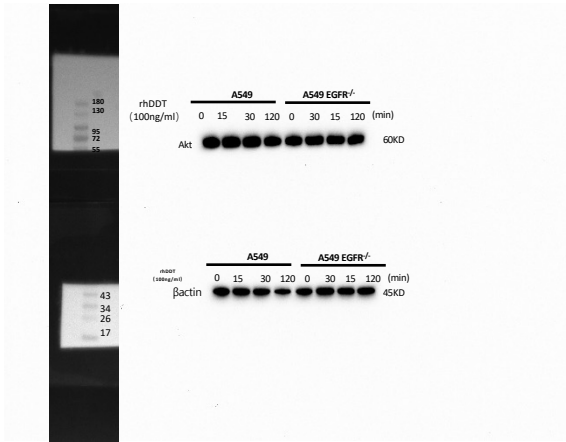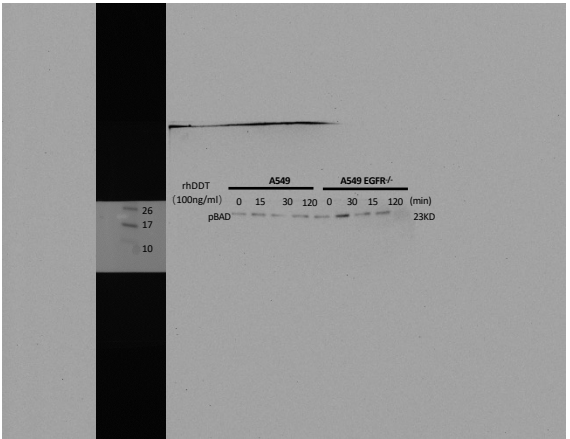

Figure 4g  
Replicate 2

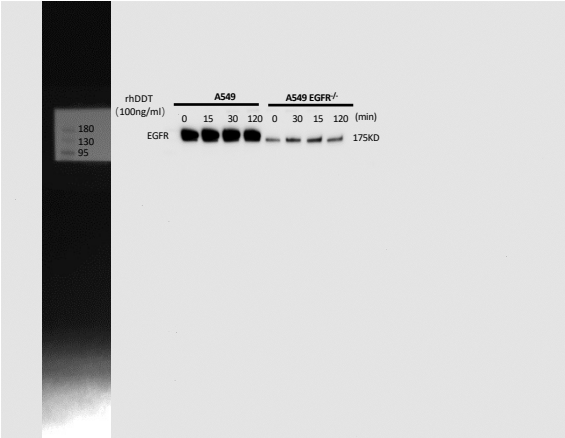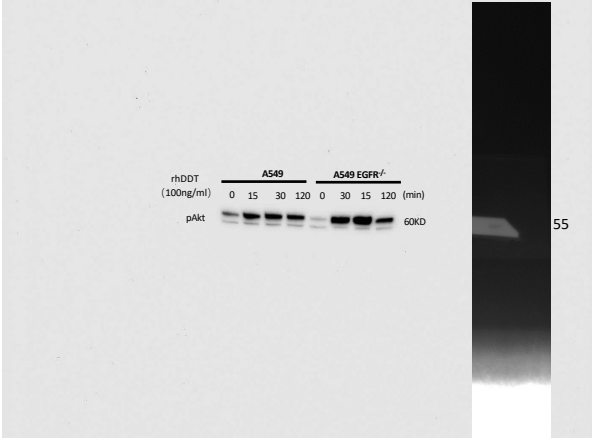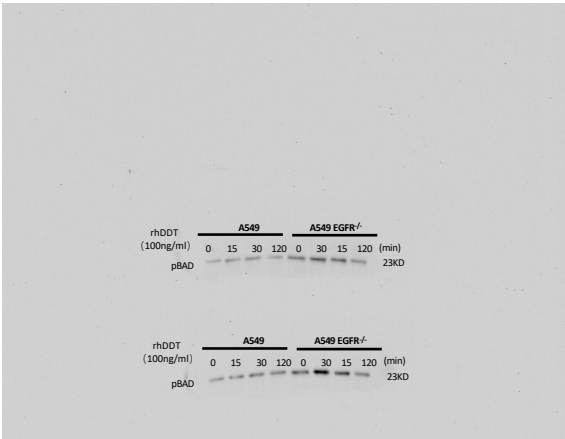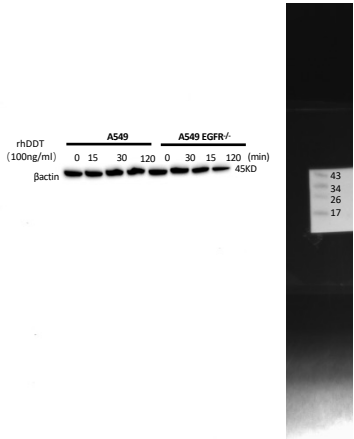

Figure 4g  
Replicate 3

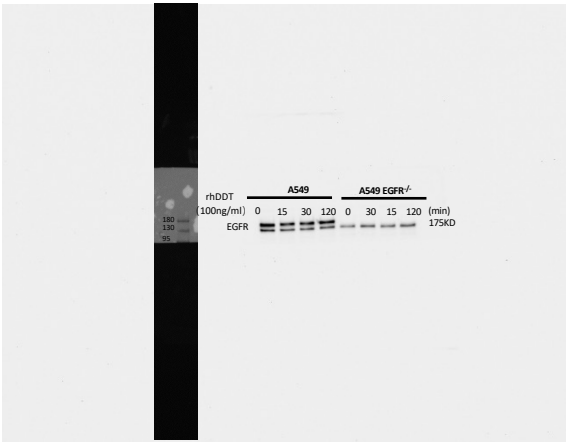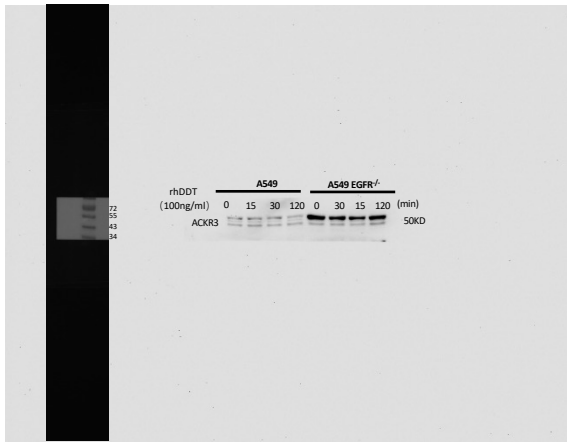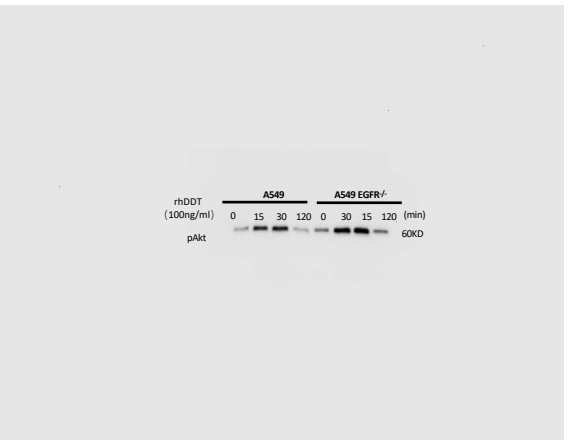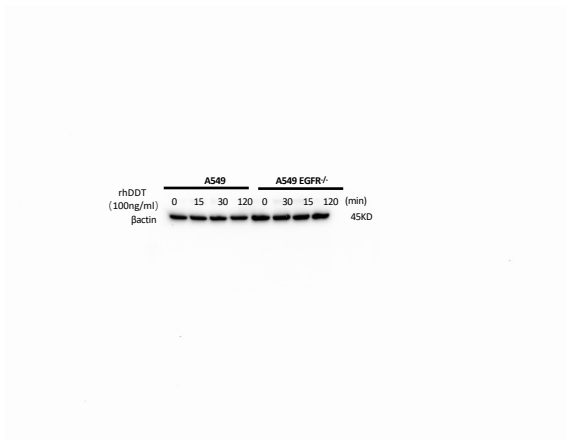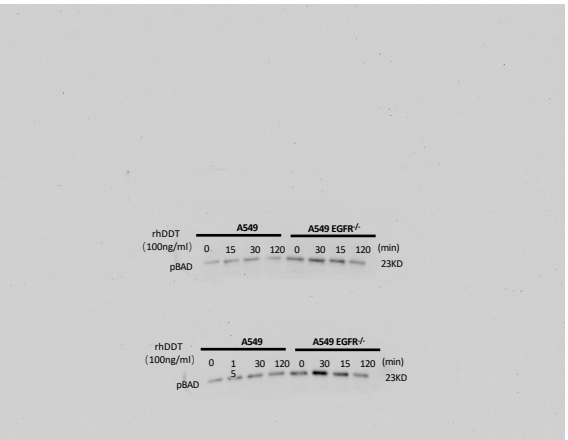



Supplementary figure 2

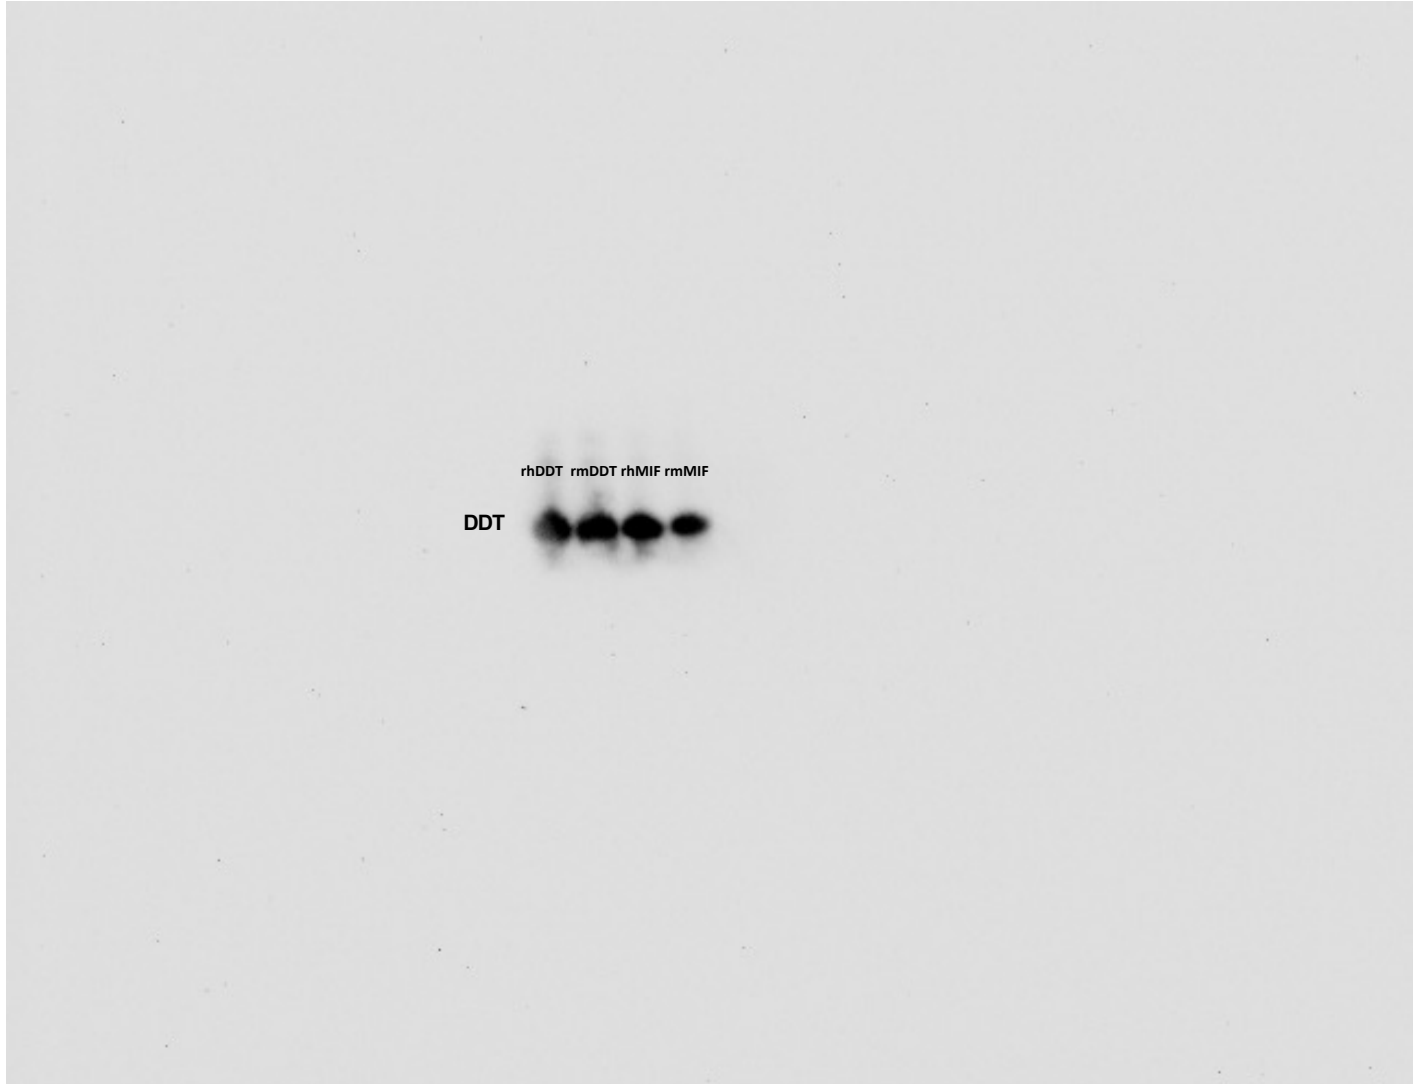

# Supplementary figure 3

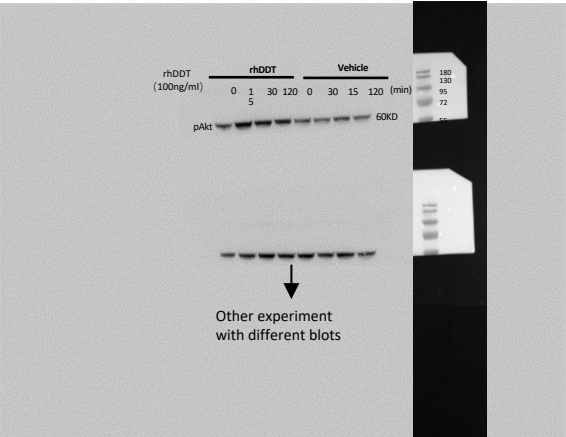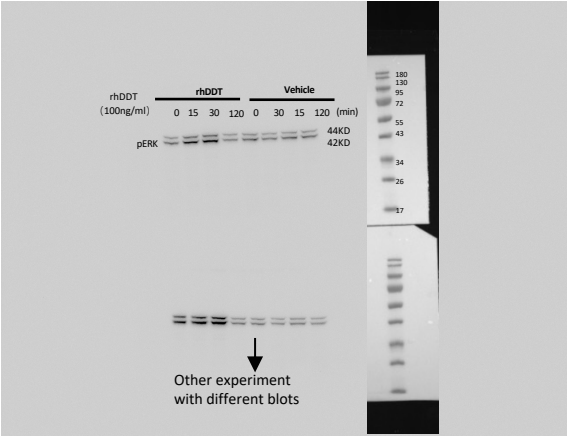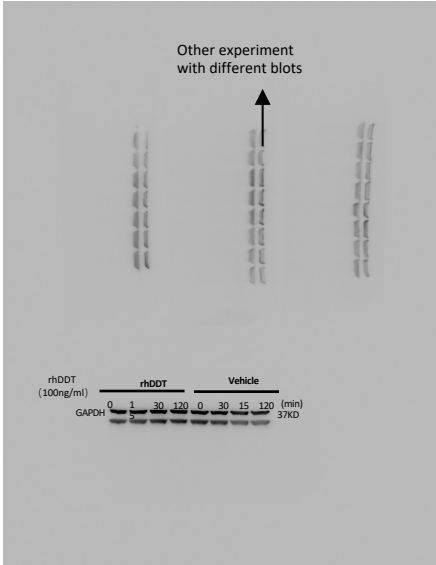

Supplementary figure 6b

Replicate 1

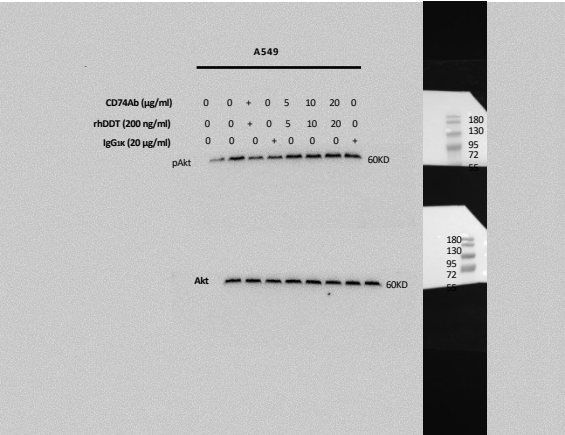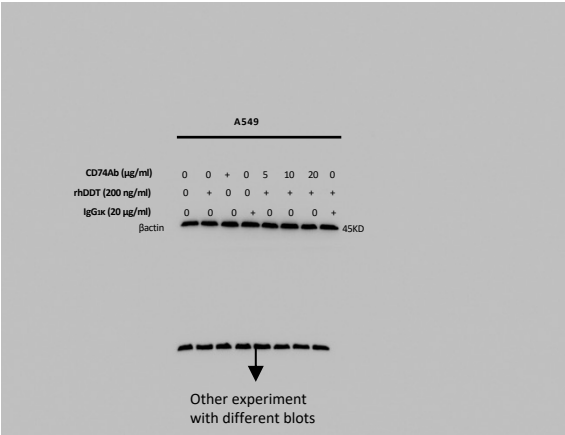

Replicate 2

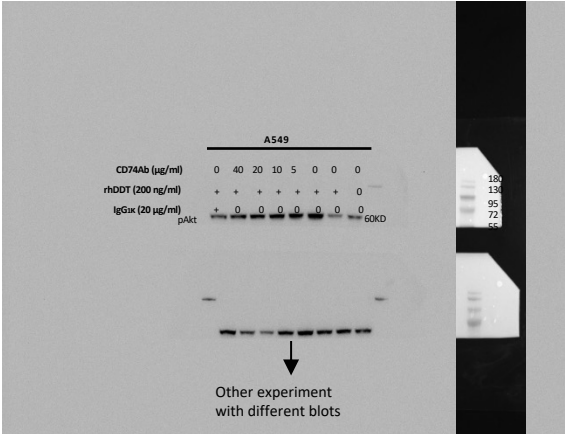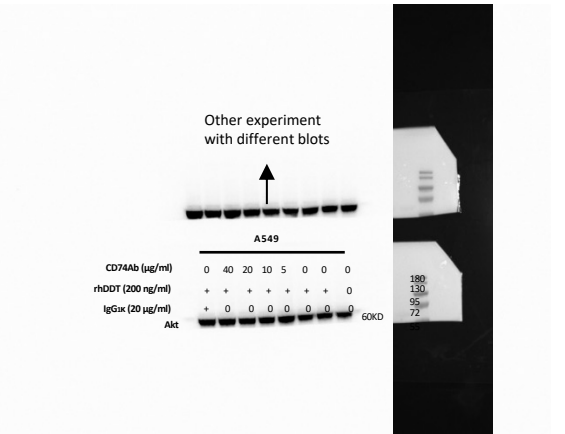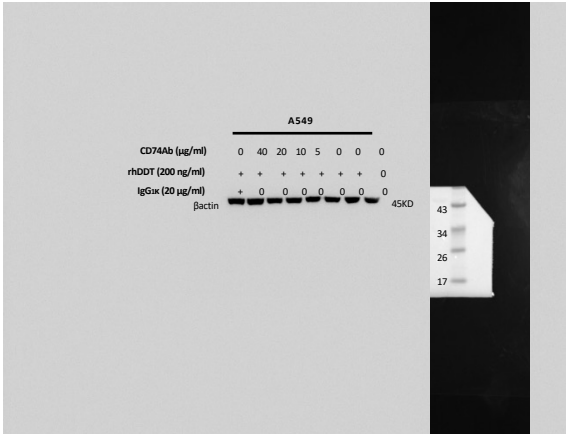

# Supplementary figure 7a

## Replicate 1

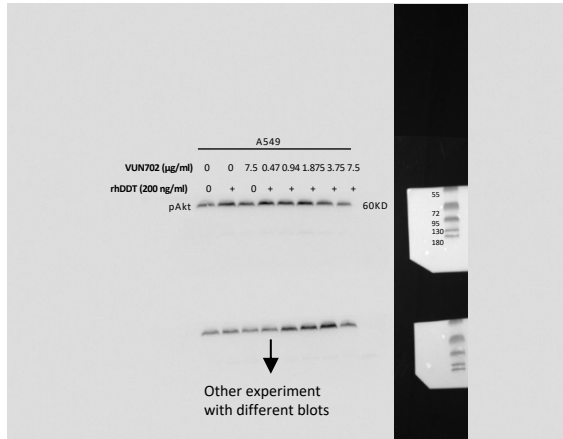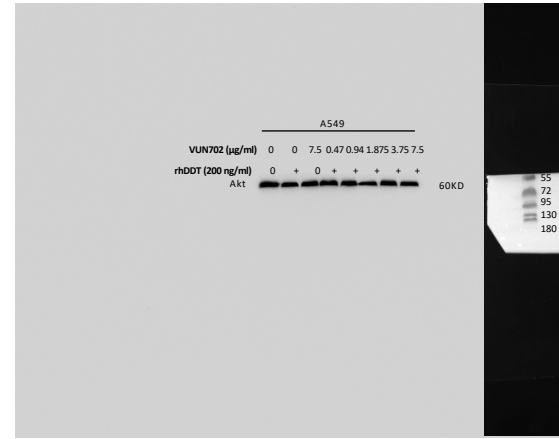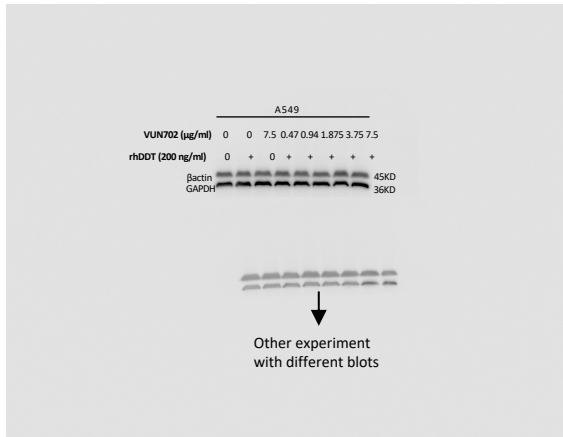

# Supplementary figure 7a

## Replicate 2

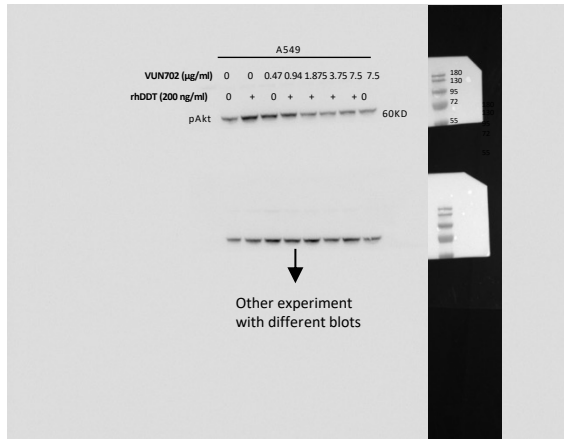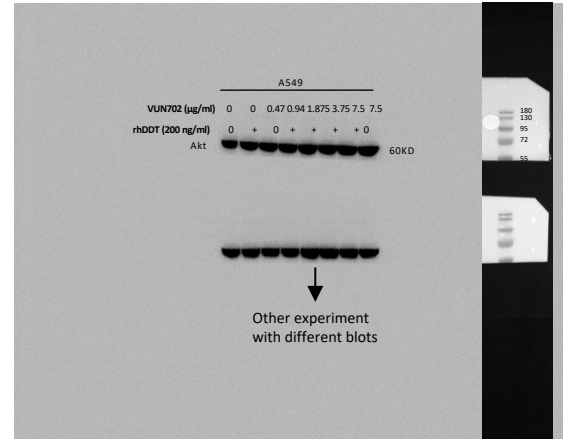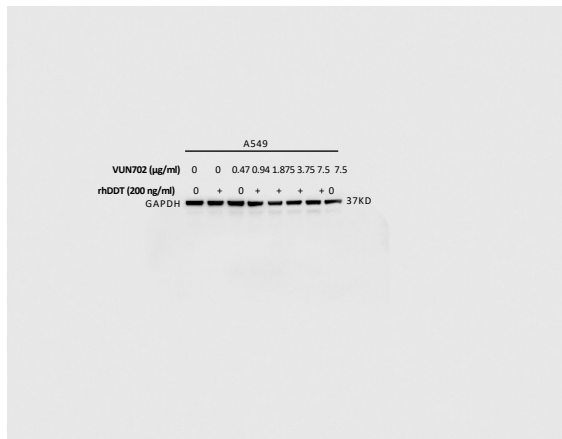

# Supplementary figure 7b

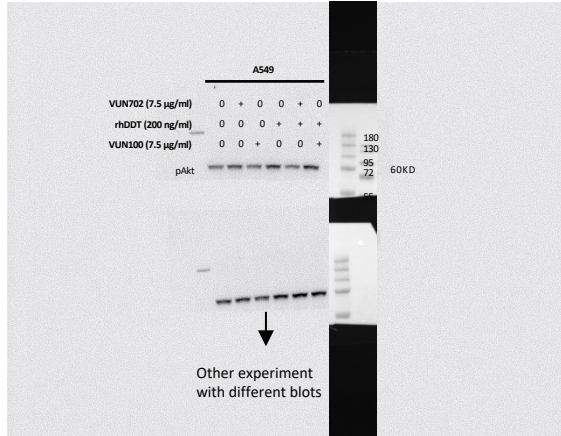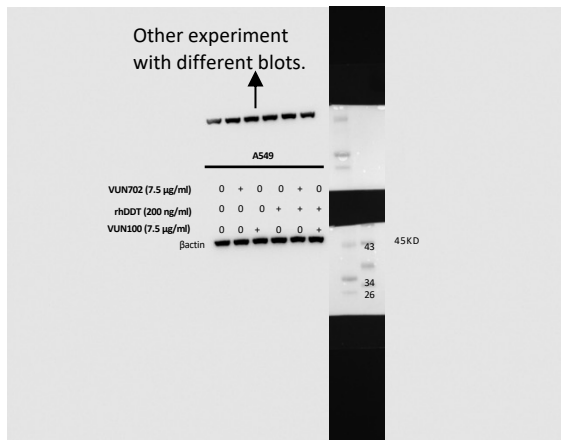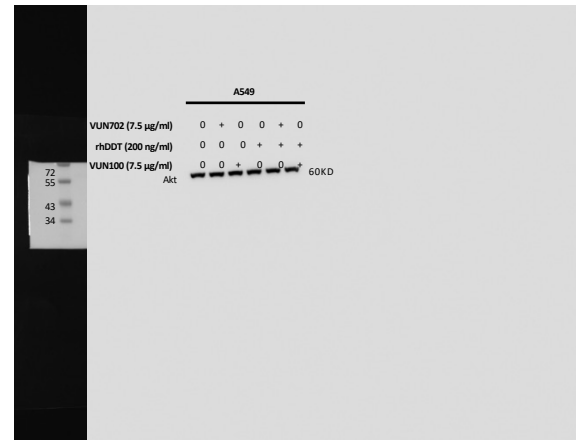

Supplement: mmc3.pdf [file mmc3.pdf]
